# Supplementary material for: Neoantigen vaccine-induced CD4 T cells confer protective immunity in a mouse model of multiple myeloma through activation of CD8 T cells against non-vaccine, tumor-associated antigens
Source: PubMed Central journal article supplement — J Immunother Cancer. 2022 Feb 21;10(2):e003572. doi: 10.1136/jitc-2021-003572 (PMC8862454; doi:10.1136/jitc-2021-003572), 2022-02-21
Supplement: jitc-2021-003572supp003.pdf [file jitc-2021-003572supp003.pdf]

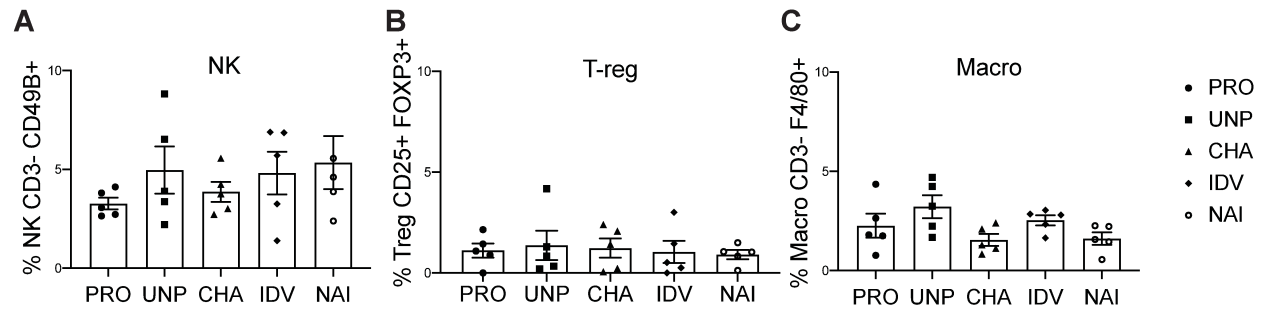

Sup. figure 3: Frequency of NK cells CD3- CD49b+ (**A**) Regulatory T cells (Treg) CD4+ CD25+ Foxp3+ (**B**) and Macrophages (Macro) CD3- F4/80+ in the BM of 5 mice per group.
