# Supplementary figures and images for: Neoantigen vaccine-induced CD4 T cells confer protective immunity in a mouse model of multiple myeloma through activation of CD8 T cells against non-vaccine, tumor-associated antigens
Source: PubMed Central journal article supplement — J Immunother Cancer. 2022 Feb 21;10(2):e003572. doi: 10.1136/jitc-2021-003572 (PMC8862454; doi:10.1136/jitc-2021-003572), 2022-02-21

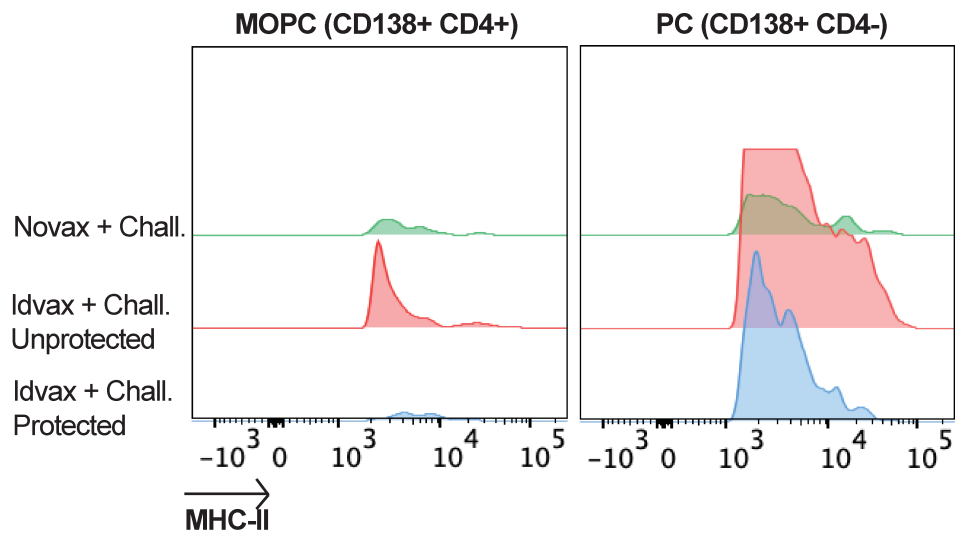

Sup. figure 2: MHC-II expression on MOPC cells (CD138+ CD4+) and plasma cells (CD138+ CD4-) from figure 2B and C

Supplement: jitc-2021-003572supp002.pdf [file jitc-2021-003572supp002.pdf]
